# Supplementary material
Source: publisher figshare collection journal article supplement (https://gsajournals.figshare.com/ndownloader/files/30612636)
Supplement: Supplementary file 1 [file 30612636]

## Sheet: Sheet1
Supplementary Table 3. G. anomalum assembly statistics compared to existing cotton genomes. Unless otherwise specified, lengths are in megabases (Mb). Genome sizes are from (Hendrix and Stewart, 2005).
	G. anomalum	G. arboreum			G. herbaceum	G.raimondii			G. turneri	G. longicalyx	G. australe	G. stocksii	G. rotundifolium
Genomic feature		Li 2014	Du 2018	Huang 2020	Huang 2020	Paterson 2012	Wang 2012	Udall 2019	Udall 2019	Grover 2020	Cai 2020	Grover 2021	Wang 2021
Number of contigs	68	4516	19704	1269	732	1033	4447	13	13	13	564	13	2390
Number of contigs > 50 Mb	21	1208	698	754	407	41	317	13	13	13	104	13	900
Largest contig	107	136	147	133	133	70.713	70.0764	65.7019	67.7042	110	161	126	205.723
Total length of contigs	1190	1710	1680	1640	1560	761	775	735	755	1190	1740	1420	2444.48
% genome size covered	0.880829	1	0.982456	0.959064	0.919269	0.864773	0.880682	0.835227	0.82967	0.907704	0.948746	0.926288	0.996122
N50	97.6829	113	121	119	118	62.1752	43.1985	58.8192	60.4641	95.8781	144	116	177.84
N75	84.89	97.8805	103	102	101	55.8682	3.82475	51.4959	53.7475	82.2265	116	106	158.067
N90	73.9516	0.162124	59.691	87.0967	92.9311	45.7656	0.851076	46.3221	43.7028	76.2894	104.993	88.4324	115.395
L50	6	7	7	7	7	6	8	6	6	6	6	6	7
L75	10	11	10	11	10	10	17	10	10	10	10	10	10
L90	12	239	13	13	12	12	100	12	12	12	12	12	13
GC content	34.27	35.46	35.02	35.2	35.02	33.21	33.21	33.19	33.21	34.18	36.38	34.95	36.38
# N's per 100 kbp	1.83	0.22	7935.38	7.1	6.75	1748.28	5549.53	2.39	2.74	0.71	880.07	1.87	4.92
Percentage of repeat sequences (RepeatMasker)	0.478992	0.455556	0.533333	0.512805	0.501923	0.386334	0.362581	0.387755	0.392053	0.484034	0.443678	0.467606	0.454493
Percentage of repeat sequences (RepeatExplorer)*	0.461369	0.631579			0.542891	0.290909			0.31978	0.463005	0.505998	0.379011	0.657317
Number of genes	37830	40134	40960	43278	43952	37223	40976	41030	38871	38378	38281	34928	39355
* Because RepeatExplorer requires quantitative sequencing and resequencing was not available for G. stocksii (E1) or G. rotundifolium (K2), G. somalense (E2) and G. exiguum (K1) were used in their place. Both replacements are very closely related to G. stocksii and G. exiguum, respectively, both phylogenetically and in genome size (Hendrix and Stewart, 2005). Only one representative accession per…
